# Supplementary material for: A Shared Pathogenic Mechanism for Valproic Acid and SHROOM3 Knockout in a Brain Organoid Model of Neural Tube Defects
Source: MDPI journal article supplement (doi:10.3390/cells12131697), 2023-06-23
Supplement: s1 [file s1]

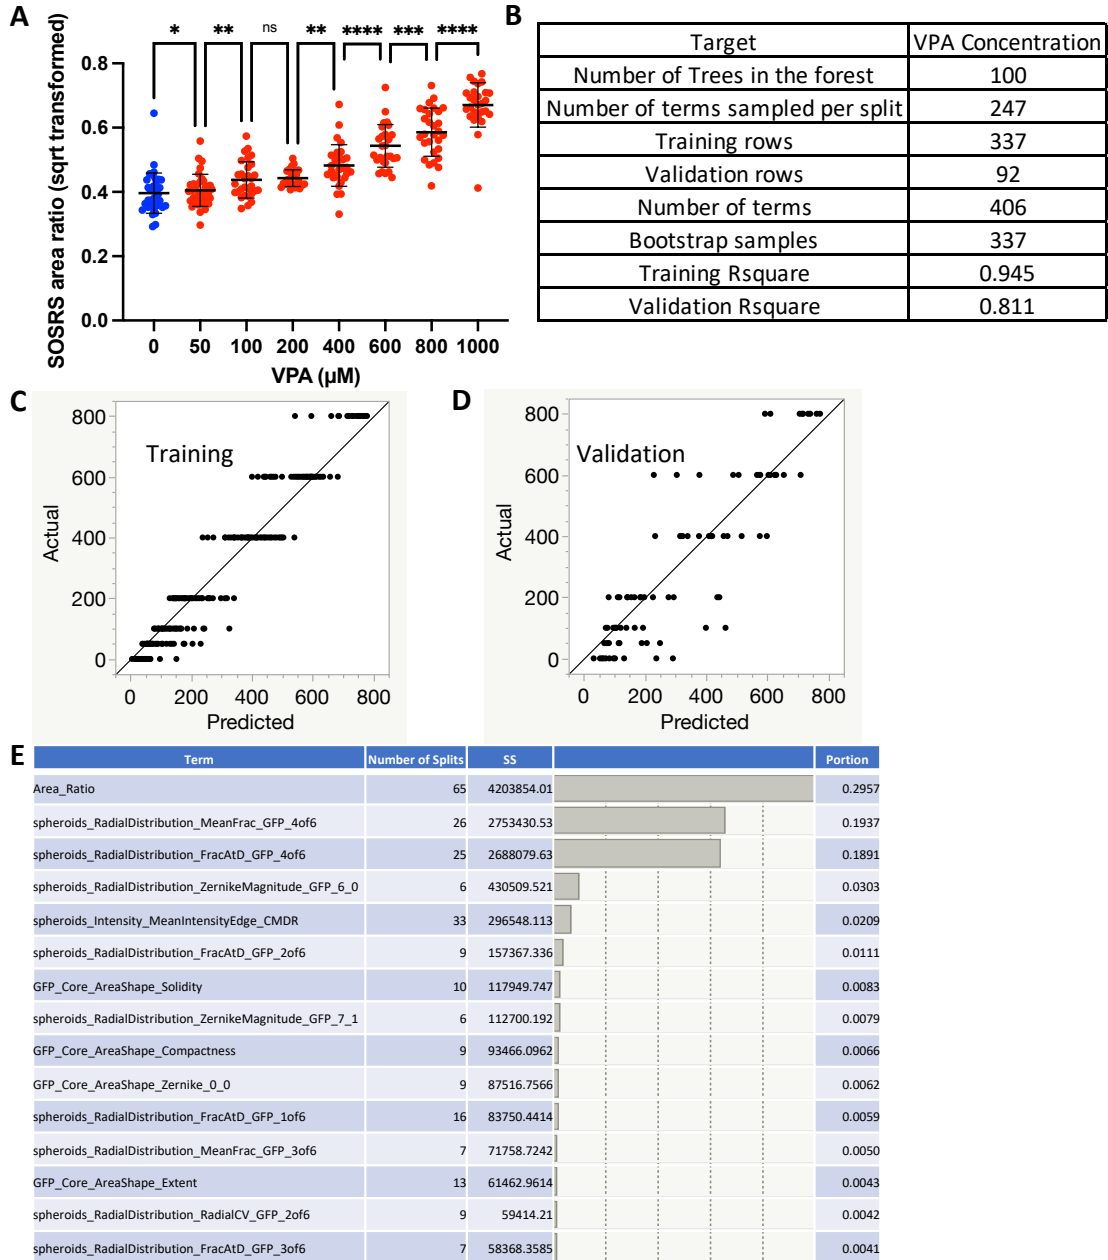

**Supplemental Figure 1.** SOSRS lumen area and radial distribution of ZO1-EGFP are distinguishing features of VPA treated SOSRS. (a) The normalized lumen area was quantified in SOSRS treated with a dose curve of VPA. Analysis was performed manually. N = 36, 36, 30, 26, 31, 29, 29, and 27, respectively across the 3 independent experiments. (b) Specific details and results for the random forest predictive model utilized with the automated data presented in Figure 2B. (c) Actual treatment concentration vs. predicted XY scatter-plot based on the bootstrap random forest model for the training data (80% of dataset). (d) Actual treatment concentration vs. predicted XY scatter-plot based on the bootstrap random forest model for the validation data (20% of dataset). (e) Top 15 most instructive features (of 407 total) for the prediction of VPA treatment concentration (from 50-800  $\mu\text{M}$ ). The portion of overall predicted value is the graphs and portion value out of a total of 1.

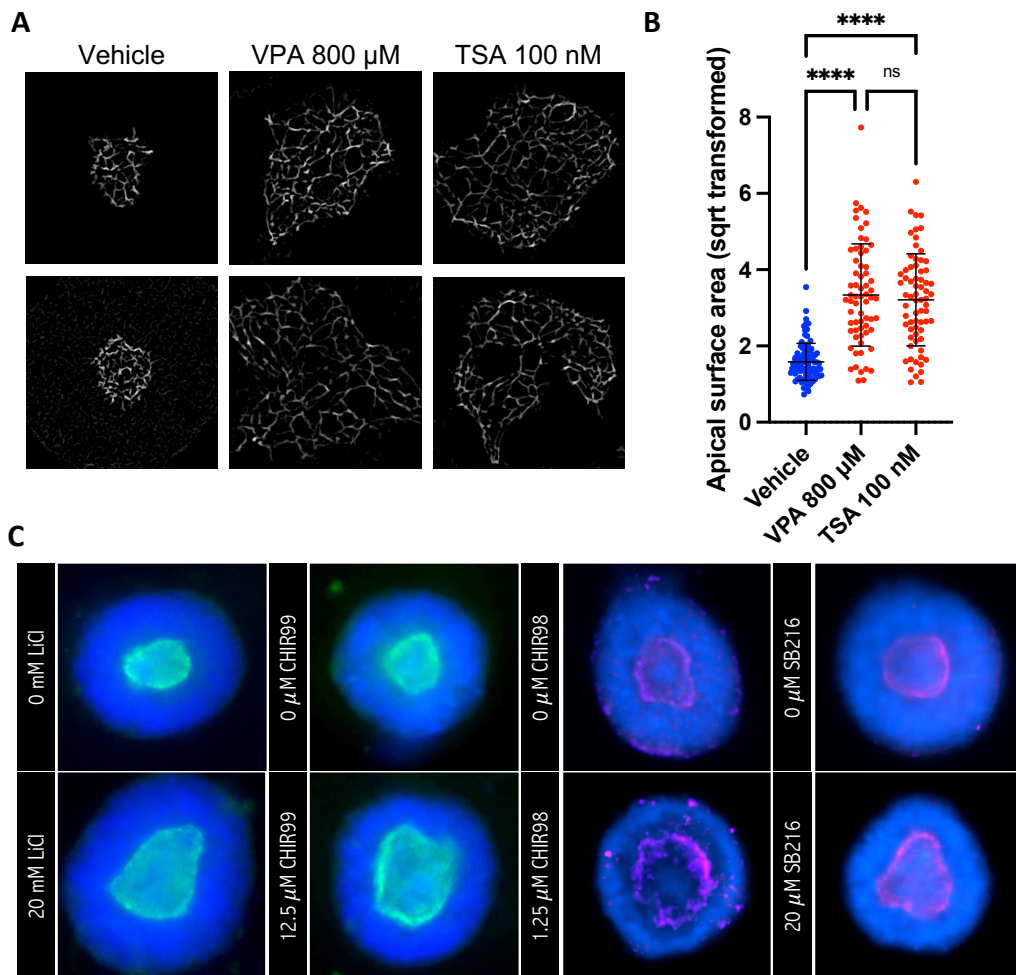

**Supplemental Figure 2.** HDAC and GSK3 $\beta$  inhibitors decrease apical constriction. (a) Apical cell surface areas were imaged by immunostaining for the tight-junction marker ZO-1 which outlines each cells apical surface. Two images for vehicle, 800  $\mu$ M VPA, and 100 nM TSA are shown. (b) Individual surfaces were measured manually for  $n = 93$  across 3 lumens, 66 across 2 lumens, and 69 across 2 lumens, respectively. (c) Exemplary manual images of SOSRS taken after labeling for DNA (bis-benzamide) and the apical lumen with either ZO1-EGFP (green) or ZO1 immunostaining (magenta). Immunostaining was necessary for some drugs due to fluorescence in the green channel interfering with ZO1-EGFP signal. Error bars are standard deviation. Statistical analysis performed with Kruskal-Wallis with Dunn's multiple comparisons post hoc. \*\*\*\*  $p < 0.0001$ .

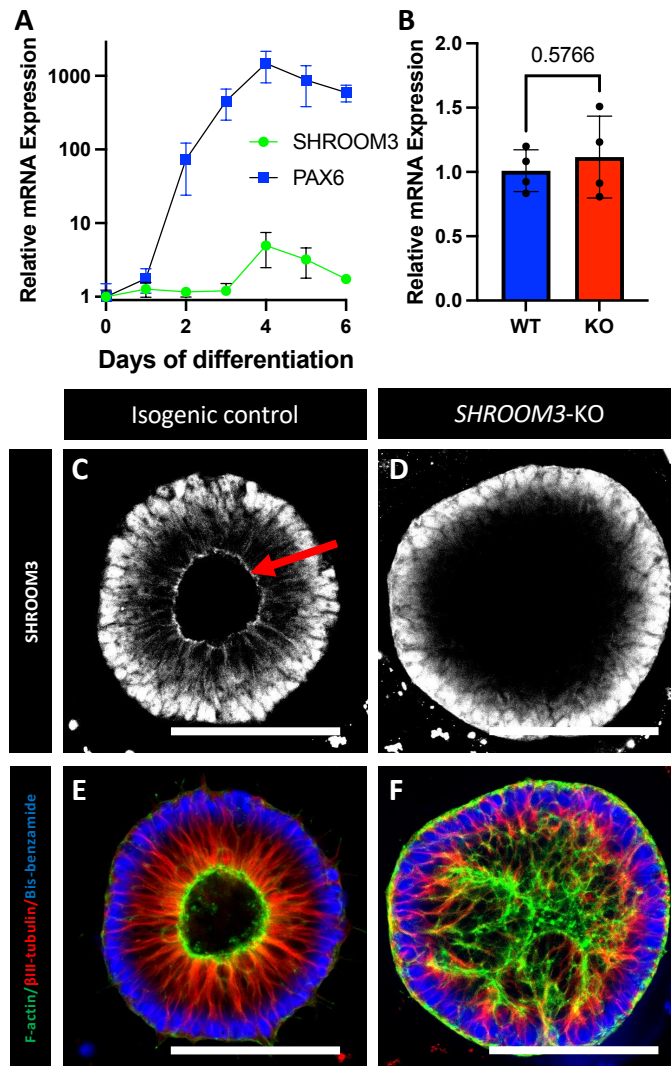

**Supplemental Figure 3.** Loss of apical SHROOM3 immunostaining confirms loss of functional protein. **(a)** Quantitative reverse transcriptase PCR was performed for *PAX6* and *SHROOM3* across 0-6 days of SOSRS differentiation.  $N = 2-4$  independent differentiations for each data point. **(b)** The same qRT-PCR was performed on day 4 for both the *SHROOM3*-KO line and isogenic control.  $N = 2$  samples for 2 independent experiments (4 total each group). Comparison was by unpaired t-test. Error bars are standard deviation. **(c-f)** Confocal micrographs of isogenic **(c,e)** and *SHROOM3*-KO SOSRS **(d,f)** stained for either SHROOM3 **(c,d)** or f-actin, beta-III-tubulin, and bis-benzamide **(e,f)**. Scale bars are 100  $\mu\text{m}$ .

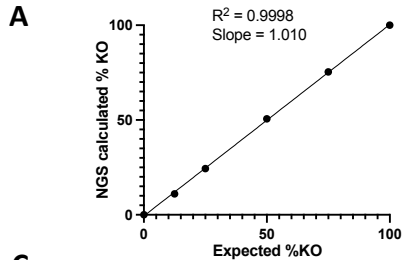

**B**

| Target                            | F-actin | ZO1   |
|-----------------------------------|---------|-------|
| Number of Trees in the forest     | 100     | 100   |
| Number of terms sampled per split | 150     | 148   |
| Training Rows                     | 1259    | 1597  |
| Validation rows                   | 329     | 416   |
| Number of terms                   | 249     | 249   |
| Bootstrap samples                 | 1259    | 1597  |
| Training Rsquare                  | 0.939   | 0.892 |
| Validation Rsquare                | 0.832   | 0.517 |

**C**

F-actin

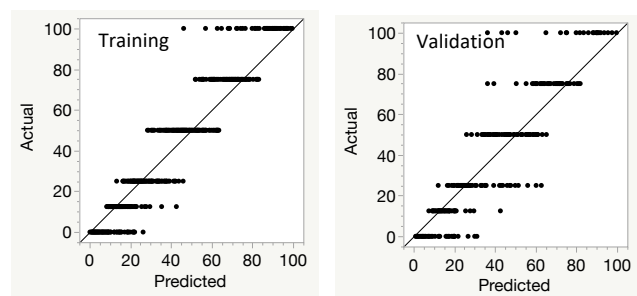

**D**

ZO1

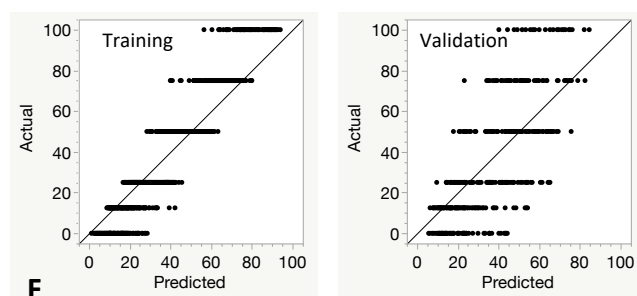

**E**

| Term                                                  | Splits | SS         | Portion |
|-------------------------------------------------------|--------|------------|---------|
| spheroids_RadialDistribution_MeanFrac_GFP_2of6        | 45     | 177894.984 | 0.2588  |
| spheroids_RadialDistribution_MeanFrac_GFP_3of6        | 32     | 64626.1991 | 0.0940  |
| spheroids_Intensity_MADIntensity_GFP                  | 32     | 57489.964  | 0.0836  |
| spheroids_RadialDistribution_MeanFrac_GFP_6of6        | 28     | 42843.6168 | 0.0623  |
| spheroids_Intensity_MeanIntensityEdge_CMDR            | 27     | 16003.7817 | 0.0233  |
| spheroids_RadialDistribution_FracAtD_GFP_2of6         | 9      | 15541.1541 | 0.0226  |
| spheroids_RadialDistribution_FracAtD_CMDR_1of6        | 20     | 12028.4781 | 0.0175  |
| spheroids_Intensity_IntegratedIntensityEdge_CMDR      | 24     | 9136.29969 | 0.0133  |
| spheroids_Intensity_StdIntensityEdge_GFP              | 16     | 7931.48711 | 0.0115  |
| spheroids_RadialDistribution_ZernikeMagnitude_GFP_2_0 | 14     | 7005.48256 | 0.0102  |
| spheroids_Intensity_StdIntensityEdge_CMDR             | 14     | 6366.08063 | 0.0093  |
| spheroids_RadialDistribution_MeanFrac_CMDR_1of6       | 22     | 5977.59661 | 0.0087  |
| spheroids_RadialDistribution_ZernikeMagnitude_GFP_8_0 | 10     | 5720.3209  | 0.0083  |
| spheroids_Intensity_StdIntensity_GFP                  | 10     | 5624.15682 | 0.0082  |
| spheroids_AreaShape_HuMoment_6                        | 28     | 5503.87733 | 0.0080  |

**F**

| Term                                                  | Splits | SS         | Portion |
|-------------------------------------------------------|--------|------------|---------|
| spheroids_RadialDistribution_MeanFrac_GFP_4of6        | 203    | 120587.341 | 0.1392  |
| spheroids_RadialDistribution_FracAtD_GFP_4of6         | 223    | 101636.292 | 0.1173  |
| spheroids_AreaShape_Solidity                          | 298    | 45975.0403 | 0.0531  |
| spheroids_RadialDistribution_MeanFrac_GFP_2of6        | 121    | 34310.4006 | 0.0396  |
| spheroids_RadialDistribution_MeanFrac_GFP_1of6        | 142    | 19301.0922 | 0.0223  |
| spheroids_AreaShape_Zernike_6_0                       | 126    | 12902.3525 | 0.0149  |
| spheroids_RadialDistribution_RadialCV_GFP_2of6        | 190    | 12808.3442 | 0.0148  |
| spheroids_Intensity_MeanIntensityEdge_CMDR            | 152    | 11778.3796 | 0.0136  |
| spheroids_AreaShape_HuMoment_4                        | 228    | 11388.8943 | 0.0131  |
| spheroids_RadialDistribution_RadialCV_GFP_5of6        | 183    | 11361.1456 | 0.0131  |
| spheroids_RadialDistribution_ZernikeMagnitude_GFP_8_4 | 123    | 9377.66767 | 0.0108  |
| spheroids_RadialDistribution_ZernikeMagnitude_GFP_8_0 | 120    | 9253.96554 | 0.0107  |
| spheroids_AreaShape_HuMoment_0                        | 122    | 8934.72706 | 0.0103  |
| spheroids_RadialDistribution_FracAtD_GFP_3of6         | 133    | 8296.61415 | 0.0096  |
| spheroids_AreaShape_Compactness                       | 175    | 7521.03411 | 0.0087  |

**Supplemental Figure 4.** Radial distribution found as most instructive feature to determine SHROOM3 genotype percentage using either f-actin or ZO1 staining. **(a)** Specific details and results for the random forest predictive model utilized with the automated data presented in Figure 6. **(b)** Actual treatment concentration vs. predicted XY scatter-plot based on the bootstrap random forest model for the training data (left: 80% of dataset) and validation data (right: 20% of dataset) for the SHROOM3 SOSRS stained for f-actin (phalloidin-Alexa488). **(c)** Actual treatment concentration vs. predicted XY scatter-plot based on the bootstrap random forest model for the training data (left: 80% of dataset) and validation data (right: 20% of dataset) for the SHROOM3 SOSRS stained for ZO1. **(d)** Top 15 most instructive features (of 407 total) for the prediction of SHROOM3 genotype percentage using f-actin dataset. **(e)** Top 15 most instructive features (of 407 total) for the prediction of SHROOM3 genotype percentage using ZO1 dataset.
